1           **Artificial selection of microbial communities to enhance**  
2                           **degradation of recalcitrant polymers**

3  
4           Robyn J. Wright<sup>1\*</sup>, Matthew I. Gibson<sup>2,3</sup> and Joseph A. Christie-Oleza<sup>1\*</sup>

5  
6           <sup>1</sup> School of Life Sciences, University of Warwick, Coventry, UK

7           <sup>2</sup> Department of Chemistry, University of Warwick.

8           <sup>3</sup> Medical School, University of Warwick, Coventry, UK

9           \*corresponding authors at: School of Life Sciences, University of Warwick, Coventry CV4 7AL,

10          UK.

11          [R.Wright.1@warwick.ac.uk](mailto:R.Wright.1@warwick.ac.uk) and [J.Christie-Oleza@warwick.ac.uk](mailto:J.Christie-Oleza@warwick.ac.uk). Tel: 024 765 72969

12  
13          **Author contributions**

14          RW and JCO designed the study. RW performed all experiments with guidance from JCO and  
15          MIG. RW wrote the first draft of the manuscript and all authors contributed substantially to  
16          revisions. The authors declare no conflicts of interest.

17  
18          **Keywords (up to ten)**

19          Artificial selection; Microbial community; Polymer degradation; Chitin degradation; Marine  
20          systems; Ecological succession

21

22 **Data accessibility:** Should this manuscript be accepted, we will make all supporting data and  
23 figures available through Dryad. All sequences have been deposited in the NCBI Short Read  
24 Archive (SRA) database under Bioproject PRJNA499076.

25

## 26 **Acknowledgements**

27 Robyn Wright was supported by a Midlands Integrative Biosciences Training Partnership PhD  
28 scholarship via grant BB/M01116X/1, Joseph Christie-Oleza by National Environment  
29 Research Council Independent Research Fellowship NE/K009044/1 and Matthew Gibson by  
30 European Research Council grant 638631. MiSeq amplicon sequencing was carried out by the  
31 University of Warwick Genomics Facility. We also thank Etienne Low-Decarie, for introducing  
32 us to the concept of microbial community artificial selection, Danielle Green, for collecting  
33 seawater from Portaferry, Sally Hilton for amplicon sequencing help and advice and Vinko  
34 Zadjelovic, Gabriel Erni Cassola, Audam Chhun, and the rest of the Christie-Oleza group, for  
35 insightful discussions and advice throughout the project.

36

## 37 **Abstract**

38 Recalcitrant polymers are widely distributed in the environment. This includes natural  
39 polymers, such as chitin, but synthetic polymers are becoming increasingly abundant, for  
40 which biodegradation is uncertain. Distribution of labour in microbial communities commonly  
41 evolves in nature, particularly for arduous processes, suggesting a community may be better  
42 at degrading recalcitrant compounds than individual microorganisms. Artificial selection of  
43 microbial communities with better degradation potential has seduced scientists for over a  
44 decade, but the method has not been systematically optimised nor applied to polymer  
45 degradation. Using chitin as a case study, we successfully selected for microbial communities  
46 with enhanced chitinase activities but found that continuous optimisation of incubation times  
47 between selective generations was of utmost importance. The analysis of the community  
48 composition over the entire selection process revealed fundamental aspects in microbial  
49 ecology: when incubation times between generations were optimal, the system was  
50 dominated by *Gammaproteobacteria*, main bearers of chitinase enzymes and drivers of chitin  
51 degradation, before being succeeded by cheating, cross-feeding and grazing organisms.

## 52 **Importance**

53 Artificial selection is a powerful and attractive technique that can enhance the biodegradation  
54 of a recalcitrant polymer and other pollutants by microbial communities. We show, for the  
55 first time, that the success of artificially selecting microbial communities requires an  
56 optimisation of the incubation times between generations when implementing this method.  
57 Hence, communities need to be transferred at the peak of the desired activity in order to  
58 avoid community drift and replacement of the efficient biodegrading community by cheaters,  
59 cross-feeders and grazers.

## 60 **1. Introduction**

61 Recalcitrant compounds are widely distributed in the environment (1–6). These include natural  
62 polymers, such as cellulose, (7) and chitin (1), and, more recently, xenobiotic compounds like plastics  
63 (2, 3, 5, 8), pesticides and detergents (9). Whilst processes to degrade natural compounds have had  
64 time to evolve and adapt, these processes may still require the participation of a consortia of  
65 organisms, each specialised in one of the multiple steps involved in the breakdown of the compound  
66 (10, 11). Laborious biodegradation processes are therefore rarely carried out entirely by a single  
67 microorganism in nature, and it is now well documented that a distribution of labour is favoured in  
68 natural microbial communities (12–16).

69

70 Many xenobiotic compounds have only existed in the last 50-100 years and microbial communities  
71 have had little time to evolve efficient biodegradation pathways to catabolise them. Some novel  
72 enzymes have, however, been discovered for new xenobiotic compounds, such as the recent  
73 discovery of an esterase involved in the degradation of poly(ethylene terephthalate) (PET) (17). This  
74 enzyme, termed “PETase”, is thought to have evolved from other esterases i.e. lipases and cutinases.  
75 Hence, although this enzyme shares considerable sequence homology with other enzymes capable  
76 of PET degradation (17–19), it has developed a higher hydrolytic activity against this polymer than  
77 any other tested esterase but, still, there is room for evolutionary improvement (18). The bacterium  
78 encoding this enzyme was isolated from a PET-degrading consortia of microorganisms and is capable  
79 of metabolising PET to its monomers, terephthalic acid and ethylene glycol (17). Similarly to the  
80 generation of toxic phenolic intermediates during lignin degradation (20), terephthalic acid can  
81 become toxic at high concentrations (21, 22) which suggests that degradation could be more efficient  
82 if carried out by a consortium rather than an individual organism. There are a number of examples

83 of microbial consortia assembled to degrade recalcitrant xenobiotic compounds e.g. phthalic acid  
84 esters, benzene, xylene and toluene (23); polychlorinated biphenyls (24); polystyrene (25); and  
85 polyethylene (26) but, due to adverse biotic and abiotic conditions (e.g. temperature, humidity,  
86 competition and predation), the natural evolutionary development of novel biodegrading pathways  
87 and/or microbial consortia may be hampered in the environment (27).

88

89 Faster evolution can be achieved through artificial selection. A whole microbial community may be  
90 used as a unit of selection (artificial ecosystem selection) so that it becomes progressively better at  
91 a selective process over successive generations (28–31). The artificial selection of a measurable and  
92 desired trait is thought to outperform traditional enrichment experiments as it bypasses community  
93 bottlenecks and reduces stochasticity (31). Artificial ecosystem selection has been implemented for  
94 developing a microbial community capable of degrading the toxic environmental contaminant 3-  
95 chloroaniline (29) as well as to lower carbon dioxide emissions during growth (31) and generating a  
96 microbial community adapted to low or high soil pH (28). However, to our knowledge, it has not been  
97 previously used for improving polymer degradation and nor have the growth parameters involved  
98 (*e.g.* incubation time) been systematically optimised to enhance the selectivity of a desired process.

99

100 In the present study we aimed to optimise the artificial selection process of a marine microbial  
101 community for polymer degradation, using chitin as a case study. Chitin is one of the most abundant  
102 polymers on Earth (*i.e.* the most abundant polymer in marine ecosystems) constituting a key  
103 component in oceanic carbon and nitrogen cycles (1). Many microorganisms are already known to  
104 degrade chitin, and the enzymes and pathways used to do so are well characterised (10). We found  
105 that a microbial community could be artificially evolved to achieve higher chitinase activities, but  
106 there were certain methodological caveats to this selection process. We found that the incubation

107 time between generations needed to be continuously optimised in order to avoid community drift  
108 and decay. Microbial community composition was evaluated and we confirmed that, if generation  
109 times are not continuously optimised, efficient biodegrading communities are rapidly taken over by  
110 cross feeders and predators with a subsequent loss of degrading activity.

## 111 **Results**

### 112 **First artificial selection experiment; process optimisation**

113 Our first artificial selection experiment highlighted the need to sub-culture each generation when the  
114 desired trait/chitinase activity was at its peak and not at a pre-defined incubation time, as done  
115 previously (28, 29, 31). Initially, we set a standardised nine-day incubation time for each generation  
116 because this was the time it took for chitinase activity to peak in a preliminary enrichment  
117 experiment (data not shown). After 14 generations we did not observe a strong increase in chitinase  
118 activity (Fig. 2A, and Supplementary Fig. S1) and, intriguingly, in nine out of the 14 generations we  
119 observed a lower activity in the positive selection than in the randomly selected control (Fig. 2A),  
120 suggesting that a random selection of microcosms is more effective in enhancing chitinase activity  
121 than actively selecting for the best communities. To further investigate the reasons behind this low  
122 efficiency, we took regular enzymatic activity measurements within generation 15 (Fig. 2B). As  
123 suspected, the chitinase activity was peaking much earlier within the generation, *i.e.* at day four, and  
124 by the end of the nine days the chitinase activity had dropped below the activities registered for the  
125 random selection experiment (Fig. 2B). Attending to this result, at generation 16 we set up an  
126 additional experiment, run in parallel, where the incubation time per generation was shortened to  
127 four days. Shortening the incubation time led to a selection of higher chitinase activities during  
128 generations 16 and 17, but the progressive increase in activity stalled by generations 18 and 19 (Fig.  
129 2A). Chitinase activity was again measured daily within the final generation 20 and we found that the  
130 enzymatic activity was almost nine times higher on day two than day four (Fig. 2C), indicating that  
131 the optimal incubation time had again been reduced. While the nine-day incubation experiment gave  
132 an overall negative trend, shortening the incubation times to the chitinase maxima drastically  
133 increased the benefits of artificial community selection (Fig. 2A).

134

### 135 **Microbial community succession**

136 We carried out MiSeq amplicon sequencing of the 16S and 18S rRNA genes to characterise the  
137 microbial community succession that occurred within the first selection experiment and, by this way,  
138 gain insight into the strong variability in chitinase activity observed over time. We sequenced the  
139 communities that were used as the inoculum of each of the 20 generations, both nine and four-day  
140 long experiments, as well as the community obtained from the daily monitoring of generation 20.  
141 This data was processed using both Mothur (32) and DADA2 workflows (33, 34), obtaining similar  
142 results (Supplementary Figs. S2 and S3). DADA2 results are presented here as this workflow retains  
143 greater sequence information, better identifies sequencing errors and gives higher taxonomic  
144 resolution (35). Unique taxa are therefore called amplicon sequence variants (ASVs) rather than  
145 operational taxonomic units (OTUs).

146

#### 147 *Community succession over the four-day incubation period within generation 20.*

148 The daily microbial community analysis over the four days at generation 20 showed a progressive  
149 increase in prokaryotic diversity (from 0.83 to 0.93, according to Simpsons index of diversity) whereas  
150 a strong decrease in diversity was observed amongst the eukaryotic community (from 0.93 to 0.38;  
151 Fig. 3A). SIMPER analyses were carried out to identify those 16S and 18S rRNA gene ASVs that were  
152 contributing most to the differences over the four successive days observed in Fig. 3B. The top five  
153 ASVs in these analyses were responsible for 50% and 60% of variation for the 16S and 18S rRNA  
154 genes, respectively (Fig. 3C).

155

156 For the 16S rRNA gene, the most important ASVs were: ASV3 (*Thalassotalea*, contributing to 16% of  
157 the community variation between the four days,  $p=0.025$ ), ASV4 (Cellvibrionaceae, 15% variation,



158  $p=0.033$ ), ASV5 (*Crocinitomix*, 8% variation,  $p=0.033$ ), ASV7 (*Terasakiella*, 6% variation,  $p=0.094$ ) and  
159 ASV2 (*Spirochaeta*, 5% variation,  $p=0.022$ ) (Fig. 3C). ASVs 3 and 4 (both *Gammaproteobacteria*)  
160 represented over 50% of the prokaryotic community abundance on day 2, when chitinase activity  
161 was highest, and their abundances followed a similar pattern to the chitinase activity over the four  
162 days (Fig. 2C), suggesting that these ASVs may be the main drivers of chitin hydrolysis. On the other  
163 hand, ASVs 7 and 2 both showed a progressive increase over time (*i.e.* from a combined relative  
164 abundance of 5% on day 1 to 23% on day 4; Fig. 3C), suggesting that these ASVs could be cross-  
165 feeding organisms that benefit from the primary degradation of chitin. Interestingly, the overall 16S  
166 rRNA gene analysis also showed a strong succession over time at higher taxonomic levels (Fig. 4).  
167 While *Gammaproteobacteria* pioneered and dominated the initial colonisation and growth,  
168 presumably, via the degradation of chitin (*i.e.* with 73% relative abundance during the first two days),  
169 all other taxonomic groups became more abundant towards the end of the incubation period (*e.g.*  
170 *Clostridia*, *Bacteroidia* and *Alphaproteobacteria* increased from an initial relative abundance of 0.1,  
171 2.8 and 12% on day one to 13.5, 22 and 21% on day four, respectively; Fig. 4). Microbial isolates  
172 confirmed *Gammaproteobacteria* as the main contributors of chitin-biodegradation (as discussed  
173 below).

174

175 The SIMPER analysis of the 18S rRNA gene highlighted ASV2 (*Cafeteria* sp., contributing to 34% of the  
176 community variation between the four days,  $p=0.016$ ), ASV4 (*Paraphysomonas*, 10% variation,  
177  $p=0.023$ ), ASV1 (*Cafeteria* sp., 6% variation,  $p=0.392$ ), ASV6 (*Apsidica*, 5% variation,  $p=0.040$ ) and  
178 ASV3 (Incertae Sedis, 5% variation,  $p=0.059$ ) as the five main ASVs contributing to 60% of the  
179 community variation over the four days (Fig 3C). ASV2, which was 96% similar to the bacterivorous  
180 marine flagellate *Cafeteria* sp., was by far the most striking Eukaryotic organism, showing an increase  
181 in relative abundance from 2% on day 1 up to over 76% on day 4 (Fig. 3B and 3C). As observed in

182 prokaryotes, Eukaryotic phylogenetic groups also showed a large variation between the beginning  
183 and the end of the incubation period, mainly due to the increase of *Bicosoecophyceae* over time (*i.e.*  
184 from 2.6 to 89% relative abundance driven by both ASV1 and ASV2; Supplementary Fig. S4).

185  
186 *Community succession over the entire artificial selection experiment.*

187 We analysed the 16S and 18S rRNA gene community composition (Supplementary Fig. S5) at the end  
188 of each generation in order to determine the effect that positive or random selection of communities  
189 had across the 20 generations, both for the nine-day incubation experiment (*i.e.* generations 0 to 20)  
190 and shortened four-day incubation experiment (*i.e.* generations 16 to 20). Most interestingly, the  
191 overall community variability across all generations (16S and 18S rRNA gene nMDS analysis; Fig. 5A)  
192 showed that only the positive selection of the shortened four-day incubations differentiated the  
193 community from the random selection, which was confirmed by a PerMANOVA test using Bray-Curtis  
194 distance (16S rRNA gene  $p=0.001$ ; 18S rRNA gene  $p=0.002$ ; Supplementary Table S2), while the nine-  
195 day selection mostly clustered with the random control communities. This is a clear explanation as  
196 to why the nine-day incubation time was not allowing a progressive selection of a community with  
197 better chitinase activities than those obtained randomly and, only when the time was shortened, did  
198 we observe an effect of the positive selection over the random selection.

199  
200 SIMPER analyses were carried out to determine the ASVs that most strongly contributed to the  
201 differences between groups (*i.e.* positive *versus* random selections and nine-day *versus* four-day  
202 incubation times; Fig. 5B). For the 16S rRNA gene, the top five ASVs identified by the SIMPER analysis  
203 contributed to 35% of the community variation, while for the 18S rRNA gene, they accounted for 61%  
204 (Fig. 5B). The 16S rRNA gene ASVs 5, 7 and 11 (*Crocinitomix*, *Terasakiella* and *Carboxylicivirga flava*,  
205 respectively) presented a much higher abundance in the four-day positive selection than in any other

206 selection (13%, 11% and 8%, respectively), suggesting that these species were the major contributors  
207 to the differentiation of these communities, as seen in Fig. 5A. As observed above for the four-day  
208 incubation analysis, *Cafeteria* sp. (18S rRNA gene ASV1 and ASV2, both 96% similar) was again the  
209 most conspicuous Eukaryotic organism. ASV2 was more abundant in the positive four-day selection  
210 (32% of the relative abundance), while ASV1 was highest in the three other selections (70% and 82%  
211 in the positive and random nine-day selection, respectively, and 16% in the random four-day  
212 selection; Fig. 5B).

213

#### 214 *Chitinase gene copies in artificially-assembled metagenomes*

215 Artificially-assembled metagenomes, generated by PICRUSt (36) from the 16S rRNA gene amplicon  
216 sequences, were used to search for enzymes involved in chitin degradation: KEGG orthologs K01183  
217 for chitinase, K01207 and K12373 for chitobiosidase, K01452 for chitin deacetylase, and K00884,  
218 K01443, K18676 and K02564 for the conversion of GlcNAc to Fructose-6 phosphate (Supplementary  
219 Fig. S6) (37–39). As expected from the measured chitinase activities, the shortened four-day  
220 incubation experiment showed over 30 times more chitinase (K01183) gene copies than the nine-day  
221 incubation experiment (*i.e.* an average of 0.66 copies per bacterium were observed in the four-day  
222 incubation experiment while only 0.025 copies per bacterium were observed over the same  
223 generations in the nine-day experiment). Also, from the daily analysis of generation 20, the chitinase  
224 activity was positively correlated with the normalised chitinase gene copy number ( $r^2=0.57$ ), with a  
225 peak in chitinase activity *and* chitinase gene copies on day 2 (*i.e.* over one chitinase gene copy per  
226 bacterium). The most striking result from this analysis was the strong bias of taxonomic groups that  
227 contributed to the chitinase and chitin deacetylase genes; chitinase genes were mainly detected in  
228 *Gammaproteobacteria* and some *Bacteroidia*, whereas the chitin deacetylase genes were almost  
229 exclusively present in *Alphaproteobacteria*. It is worth highlighting that the chitosanase gene

230 (K01233), the enzyme required to hydrolyse the product from chitin deacetylation, chitosan, was not  
231 detected in any of the artificial metagenomes. Chitobiosidases (K01207 and K12373) and enzymes  
232 involved in the conversion of GlcNAc to Fructose-6 Phosphate (K00884, K01443, K18676 and K02564)  
233 were more widespread. Nevertheless, this data needs to be taken with caution as these were not  
234 real metagenomes.

235

### 236 *Isolation and identification of chitin degraders*

237 Bacterial isolates were obtained from the end of the artificial selection experiments to confirm the  
238 ability of the identified groups to degrade chitin. From the 50 isolates obtained, 20 were unique  
239 according to their 16S rRNA gene sequences. From these, 18 showed at least 98% similarity with one  
240 or more of the MiSeq ASVs (Supplementary Table S3) although, unfortunately, none belonged to the  
241 most abundant ASVs detected during the community analysis. The ability for chitin and GlcNAc  
242 degradation by each one of the isolates was assessed. We found that 16 of these isolates could grow  
243 using GlcNAc as the sole carbon source, but only 11 of these strains could grow on chitin (Fig. 4). The  
244 four remaining bacteria from the 20 isolated could not grow using chitin or GlcNAc. Most  
245 interestingly, all isolates from the class *Gammaproteobacteria* ( $n=7$ ) were capable of chitin  
246 degradation whereas only a smaller subset of isolates had this phenotype in other abundant  
247 taxonomic groups, such as *Bacteroidia* (1 out of 3) or *Alphaproteobacteria* (1 out of 8; Fig. 4).

248

### 249 **Second artificial selection experiment; implementing an improved selection process**

250 A second selection experiment showed an extremely rapid boot in chitinase activity *i.e.* reaching  
251 almost  $90 \mu\text{M day}^{-1}$  in only 7 generations (Figs. 6, and S7), when the maximum activity achieved in  
252 the first experiment was  $0.9 \mu\text{M day}^{-1}$  (Fig. 2C), demonstrating that implementing an optimised  
253 incubation time between generations largely enhances the selection of a desired trait. Chitinase

254 activity was measured daily until a peak in chitinase activity was observed. The communities with  
255 highest chitinase activity on this day were used to start the next generation.  
256

## 257 **Discussion**

258 Artificial selection of microbial communities is, in principle, a powerful and attractive technique which  
259 has surprisingly been used in only a limited number of studies to date (28, 29, 31), possibly due to  
260 the lack of success as a consequence of poor process optimisation. Here, using chitin degradation as  
261 a case study and a detailed analysis of the community succession, we show that artificial selection of  
262 microbial communities can be largely improved by controlling the incubation times between  
263 generations. The rapid succession of microbial community structure means generations need to be  
264 transferred at the peak of the selected phenotypic activity (*e.g.* chitinase activity) or these get rapidly  
265 replaced by less efficient communities of cross-feeding microorganisms (*i.e.* bacteria and grazers).  
266 Previous studies that have artificially selected microbial communities for a particular phenotype did  
267 not report optimisation of the incubation time between generations (28, 29, 31) which, in our hands,  
268 would have resulted in a negative selection (Fig. 2). In agreement with our results, Penn and Harvey  
269 (2004) (40) suggested that the observed phenotype in artificial ecosystem selection experiments  
270 could be significantly affected by community structure.

271

272 An understanding of microbial ecology helps explain the importance of the timing during generation  
273 transfer. Datta et al. (2016) (42) observed three distinct stages of community structure during the  
274 colonisation of chitin particles: (a) attachment; (b) selection, and; (c) succession. Each phase was  
275 characterised by having relatively higher abundances of organisms that were: (a) good at attaching  
276 to chitin particles; (b) good at degrading chitin particles, and; (c) not able to degrade chitin, but able  
277 to benefit from others that could, *i.e.* “cheaters” and cross-feeders (43, 44). During our first  
278 experiment, as communities become better and faster at degrading chitin, we were measuring the  
279 chitinase activity when the communities were in the succession rather than in the selection stage and,

280 therefore, the active chitinolytic community had decayed and was dominated by cheaters and cross-  
281 feeders (Figs. 3 and 4). Hence, it was only when selecting at phenotypic time optima when chitinase  
282 activity improved and the overall community differentiated from the random control communities  
283 (Fig. 5 and 6). It is also interesting to note the selection of the grazer *Cafeteria* sp. (90% of the  
284 Eukaryotic community), a genus of bacterivorous marine flagellates that are commonly associated with  
285 marine detritus (45). The predator-prey dynamics postulated by Lotka–Volterra’s equations would  
286 also support the need to shorten generation times to favour the prey’s growth *i.e.* chitinolytic  
287 bacteria (46, 47).

288

289 Interestingly, a strong successional pattern was observed at a higher taxonomic level. While  
290 *Gammaproteobacteria* dominated during the initial stages when chitinase activity was at its peak  
291 (accounting for over 70% of the prokaryotic community), other groups increased in abundance during  
292 the later stages (*i.e.* *Alphaproteobacteria*, *Bacteroidia* and *Clostridia*), similarly to the pattern  
293 previously observed by Datta et al. (2016) (42).

294

295 The fact *Gammaproteobacteria* are major contributors to chitin degradation is not new (48–53). All  
296 *Gammaproteobacteria* isolates obtained from the end of the experiments were able to grow using  
297 chitin as the only source of carbon and energy (Fig. 4) confirming that this class is likely responsible  
298 for most of the chitinase activity observed. On the other hand, *Alphaproteobacteria*, the numerically  
299 dominant class of heterotrophic bacteria in surface oceans (54, 55), follow a cross-feeding and/or  
300 cheating life-strategy as five out of eight *Alphaproteobacterial* isolates could only use N-acetyl-D-  
301 glucosamine (GlcNAc) and only one could use chitin. This was confirmed by the PICRUSt metagenome  
302 analysis (Fig. S6), where almost all chitinase enzymes copies were encoded by *Gammaproteobacteria*  
303 (*i.e.* 90%; encoding almost one gene copy per bacterium) and, to a lesser extent, by some *Bacteroidia*.

304 Chitin is made up of molecules of GlcNAc linked by (1,4)- $\beta$ -glycosidic bonds, and it has previously  
305 been found that initial degradation of chitin takes place predominantly by: i) chitinases which  
306 depolymerise the (1,4)- $\beta$ -glycosidic bonds either at the ends or in the middle of chains, or ii)  
307 chitobiosidase enzymes which also hydrolyse (1,4)- $\beta$ -glycosidic bonds but only at the ends of chitin  
308 chains. Genes for the intracellular enzymes involved in GlcNAc utilisation (*i.e.* transformation of  
309 GlcNAc to Fructose-6-phosphate) were much more widespread amongst different taxonomic groups,  
310 highlighting the broader distribution of cross-feeding or cheating organisms which can benefit from  
311 the extracellular depolymerisation of chitin which generates freely available GlcNAc to the  
312 community. Alternative degradation of chitin may also occur by deacetylation and deamination of  
313 the GlcNAc amino sugar, transforming chitin into chitosan and cellulose, respectively, after which  
314 they can be depolymerised by a range of other enzymes (*e.g.* chitosanases or cellulases) (10, 56, 57).  
315 While *Alphaproteobacteria* did not contribute to chitinase enzymes, it *did* potentially encode for  
316 most of the chitin deacetylases in the system, although no chitosanases were detected.

317

318 Chitinolytic organisms have previously been found to make up between 0.1 and almost 6% of  
319 prokaryotic organisms in aquatic ecosystems (43, 58), while over a third of the organisms in these  
320 habitats can utilise only the products of chitin hydrolysis (*i.e.* GlcNAc) (43, 59–61). With  
321 *Gammaproteobacteria* being primarily responsible for the degradation of chitin here, the success of  
322 the artificial selection for an enhanced chitinolytic community was possibly achieved by the selective  
323 enrichment of this group between the beginning (5% of the prokaryotic community, within the  
324 expected range of *Gammaproteobacteria* found within natural environments) (43, 58) and end of the  
325 experiment (75% of the community).

326



327 Here we have proven the validity of artificially selecting a natural microbial community to better  
328 degrade a recalcitrant polymer, but have highlighted the caveats for achieving this goal, which  
329 require a better understanding of the ecology of the system. We found that optimisation of  
330 incubation times is essential in order to successfully implement this process, as optimal communities  
331 enter rapid decay due to their replacement by cheaters and cross-feeders, as well as the increase of  
332 potential predators such as grazers and, although not tested here, viruses. Hence, future artificial  
333 selection experiments should adjust generation incubation times to activity maxima to successfully  
334 evolve enhanced community phenotypes.

335

## 336 **Materials and methods**

### 337 **Microbial inoculum**

338 The microbial community used as an inoculum was obtained from bulk marine debris collected during  
339 boat tows from both Plymouth Sound (Devon, UK; June 2016) and Portaferry (Northern Ireland, UK;  
340 August 2016).

341

### 342 **Chitinase activity measurements**

343 Chitinase activity was measured as the liberation of the fluorogrescent molecule 4-methylumbelliferyl  
344 (MUF) from three chitinase substrates (MUF-N-acetyl- $\beta$ -D-glucosaminide, MUF- $\beta$ -D-N,N'-  
345 diacetylchitobioside and MUF- $\beta$ -D-N,N',N''-triacetylchitotrioside; Sigma Aldrich, UK), following the  
346 previously described method (49, 62, 63) (Supplementary information). Standards curves were  
347 obtained using chitinase from *Streptomyces griseus* (Sigma Aldrich, UK) dissolved in sterile phosphate  
348 buffered saline solution (pH 7.4; 0.137 M) with a highest concentration of 0.1 U mL<sup>-1</sup> (activity  
349 equivalent to 144  $\mu$ M day<sup>-1</sup>). Samples were diluted prior to measurement if they were expected to  
350 be above this range.

351

### 352 **Artificial selection**

353 The process for artificial selection is depicted in Figure 1. Briefly, 30 individual microcosms per  
354 treatment and generation were incubated in the dark under the conditions described below. At the  
355 end of each generation the three microcosms with the highest chitinase activities (or three random  
356 microcosms in the case of the control) were pooled and used as the inoculum for the next generation  
357 of microcosms ( $n=30$ ). This was repeated across multiple generations. Two artificial selection

358 experiments were performed, the first to optimise the process, and the second to implement optimal  
359 conditions and achieve a high-performing chitinolytic microbial community:

360

361 *First artificial selection experiment.*

362 Incubations were carried out at 23°C in 22 mL glass vials (Sigma Aldrich), each containing 20 mL of  
363 autoclaved seawater (collected from outside Plymouth Sound, Devon, UK; June 2016) supplemented  
364 with NaH<sub>2</sub>PO<sub>4</sub>, F/2 trace metals (64) (Supplementary information) and 100 mg of chitin powder (from  
365 shrimp shells; Sigma Aldrich) as the sole source of carbon and nitrogen. Generation 0 was started  
366 with 200 µL of microbial inoculum. The efficiency of the selection process was assessed by comparing  
367 a ‘positive selection’ (where the three communities with highest activity were pooled and 200 µL was  
368 used to inoculate each one of the 30 microcosms of the next generation) against a ‘random selection’  
369 (where three communities were chosen at random, using a random number generator within the  
370 Python module Random, to inoculate the following generation) to give a control against  
371 uncontrollable environmental variation (65). Each treatment was repeated across 20 generations  
372 with incubation times of nine days. In parallel, treatments where incubation times were shortened  
373 to four days were setup after generation 15. Samples were taken from each community and stored  
374 in 20% glycerol at -80°C for further microbial isolation, and pellets from 1.5 ml of culture were  
375 collected by centrifugation (14,000 x *g* for 5 mins) and stored at -20°C for final DNA extraction and  
376 community analysis.

377

378 *Second artificial selection experiment.*

379 A second selection experiment was setup implementing optimal generation times. Microcosms were  
380 incubated in 2 mL 96-well plates (ABgene™, ThermoFisher Scientific) covered by Corning®  
381 Breathable Sealing Tapes to stop evaporation and contamination while allowing gas exchange. Each

382 well contained 1.9 mL of a custom mineral media containing MgSO<sub>4</sub>, CaCl<sub>2</sub>, KH<sub>2</sub>PO<sub>4</sub>, K<sub>2</sub>HPO<sub>4</sub>, 0.52 M  
383 NaCl and artificial seawater trace metals (Supplementary information), supplemented with 10 mg of  
384 chitin powder. The microbial inoculum was 100 µL (*i.e.* initial inoculum and transfer between  
385 generations). Chitinase activity was measured daily. Transfer between generations was carried out  
386 just after the peak of chitinase activity had occurred, calculated as the average chitinase activity  
387 across the 30 microcosms of the positive selection treatment. Plates were incubated in the dark at  
388 30°C with constant shaking (150 rpm). Eight days was the maximum incubation time allowed to reach  
389 maximum chitinase activity due to volume constraints.

390

#### 391 **DNA extraction and amplicon sequencing**

392 DNA was extracted using the DNeasy Plant Mini Kit (Qiagen) protocol, with modifications as follows  
393 (adapted from 66): 300 µL 1 x TAE buffer was used to resuspend cell pellets and these were added to  
394 ~0.4 g of sterile 0.1 mm Biospec zirconia silica beads in 2 mL screw cap microtubes (VWR  
395 international). Bead beating was carried out for 2 x 45 s and 1 x 30 s at 30 Hz using a Qiagen Tissue  
396 Lyser. Cell lysates were then processed in accordance with the manufacturer's instructions, with an  
397 extra centrifugation step to ensure all liquid was removed (1 min, 13,000 x *g*) directly before elution  
398 of samples. A Qubit® HS DNA kit (Life Technologies Corporation) was used for DNA quantification  
399 after which they were diluted to equalise the concentrations across samples. A Q5® Hot Start High-  
400 Fidelity 2X Master Mix (New England Biolabs® inc.) was used to amplify the 16S rRNA gene v4-5  
401 regions using primers 515F-Y and 926R (67), and the 18S rRNA gene v8-9 regions using primers V8F  
402 and 1510R (68) (Supplementary information). PCR products were purified using Ampliclean magnetic  
403 beads (Nimagen, The Netherlands). Index PCR was carried out using Illumina Nextera Index Kit v2  
404 adapters. Samples were normalised using a SequelPrep™ Normalisation Plate Kit (ThermoFisher  
405 Scientific). Samples were pooled and 2 x 300 bp paired-end sequencing was carried out using the

406 MiSeq system with v3 reagent kit. Negative and chitin only DNA extraction controls and library  
407 preparation negative controls were processed and sequenced alongside samples.

408

#### 409 **Microbial community structure determination**

410 Two different workflows were used to analyse the sequencing data: DADA2 (33, 34) and Mothur (32).  
411 DADA2 delivers better taxonomic resolution than other methods (*e.g.* Mothur) as it retains unique  
412 sequences and calculates sequencing error rates rather than clustering to 97% similarity (35). The  
413 resultant taxonomic units are referred to as amplicon sequence variants (ASVs) rather than  
414 operational taxonomic units (OTUs from Mothur). For the DADA2 analysis, sequencing data were  
415 processed following the DADA2 (version 1.8.0) pipeline (33). Briefly, the data were filtered, *i.e.*  
416 adapter, barcode and primer clipped, and the ends of sequences with high numbers of errors were  
417 trimmed. The amplicons were denoised based on a model of the sequencing errors and paired end  
418 sequences were merged. Only sequences between 368 - 379 for the 16S rRNA gene and 300 - 340 for  
419 the 18S rRNA gene were kept and chimeras were removed. The resulting ASVs were classified using  
420 the SILVA reference database (v132) (69). For the Mothur analysis (32), sequencing data were filtered  
421 *i.e.* adapter, barcode and primer clipped, sequence length permitted was 450 bp for the 16S rRNA  
422 gene and 400 bp for the 18S rRNA gene, maximum number of ambiguous bases per sequence = 4,  
423 maximum number of homopolymers per sequence = 8. Taxonomy assignment was performed using  
424 the SILVA reference database (Wang classification, v128) (69) and operational taxonomic units  
425 (OTUs) set at 97% similarity. For both processing workflows, chloroplasts, mitochondria and  
426 Mammalia were removed from the 16S rRNA gene and 18S rRNA gene datasets, eukaryotes were  
427 removed from the 16S rRNA gene dataset, and bacteria and archaea from the 18S rRNA gene dataset.  
428 The average number of reads per sample was approximately 12,500 for the 16S rRNA gene and  
429 20,000 (Mothur) or 34,000 (DADA2) for the 18S rRNA gene. Samples with less than 1,000 total reads

430 were excluded from downstream analyses. Although most analyses were carried out using relative  
431 abundance, each sample was subsampled at random to normalise the number of reads per sample,  
432 and the resulting average coverage was 92% (Mothur) or 94% (DADA2) for the 16S rRNA gene and  
433 99% (Mothur and DADA2) for the 18S rRNA gene.

434

#### 435 **Microbial isolation and characterisation**

436 Microbes were isolated from the final generation of positive selection experiments by plating serial  
437 dilutions on Marine Broth 2216 (BD Difco™) and mineral medium plates (*i.e.* custom medium;  
438 Supplementary information) supplemented with 0.1% N-acetyl-D-glucosamine (GlcNAc) and 1.5%  
439 agar. Colonies were re-streaked on fresh agar plates until pure isolates were obtained. The  
440 identification of isolates was carried out by sequencing the partial 16S rRNA gene (GATC BioTech,  
441 Germany) using primers 27F and 1492R (70) (Supplementary information).

442

443 Isolates were grown in custom mineral medium supplemented with either 0.1% chitin or 0.1% GlcNAc  
444 (w/v), as sources of carbon and nitrogen, to test for chitinase activity and chitin assimilation,  
445 respectively. Growth was monitored over 14 days by measuring: i) chitinase activity (as described  
446 above), ii) optical density at 600 nm, and iii) protein content (following manufacturer's instructions;  
447 QuantiPro™ BCA Assay Kit, Sigma Aldrich, UK). Isolates were also tested on custom mineral medium  
448 agar plates made with the addition of 0.1% chitin and 0.8% agarose. Plates were incubated at 30°C  
449 for 21 days to allow the formation of halos indicative of chitinase activity.

450

#### 451 **Statistical analyses**

452 All analyses of chitinase activity and most MiSeq data analyses were carried out using custom Python  
453 scripts (Python versions 2.7.10 and 3.6.6) using the modules: colorsys, csv, heapq, matplotlib, numpy,

454 os, pandas, random, scipy, scikit-bio, sklearn (71), and statsmodels. SIMPER analyses and plotting of  
455 phylogenetic trees were performed in R (R version 3.3.3) (72) using the following packages: ape (73),  
456 dplyr, ggplot2, gplots, ggtree (74), lme4, phangorn (75), plotly, tidyr, vegan (76), phyloseq (77). The  
457 top 5 ASVs identified in each SIMPER analyses were classified to their closest relative using a BLAST  
458 search of the GenBank database with a representative sequence. Hypothetical community functions  
459 were obtained using PICRUSt in QIIME1 (36, 78). Sequences used for phylogenetic trees were aligned  
460 using the SILVA Incremental Alignment ([www.arb-silva.de](http://www.arb-silva.de)) (79) and mid-point rooted maximum  
461 likelihood trees were constructed using QIIME1 (78). All scripts can be found at <https://github.com/R->  
462 [Wright-1/ChitinSelection.git](https://github.com/R-Wright-1/ChitinSelection.git). All sequences have been deposited in the NCBI Short Read Archive  
463 (SRA) database under Bioproject PRJNA499076.





## 465 **References**

- 466 1. Souza CP, Almeida BC, Colwell RR, Rivera ING. 2011. The Importance of Chitin in the Marine  
467 Environment. *Mar Biotechnol* 13:823–830.
- 468 2. Barnes DK a, Galgani F, Thompson RC, Barlaz M. 2009. Accumulation and fragmentation of  
469 plastic debris in global environments. *Phil Trans R Soc B* 364:1985–1998.
- 470 3. Derraik JGB. 2002. The pollution of the marine environment by plastic debris: A review. *Mar*  
471 *Pollut Bull* 44:842–852.
- 472 4. Thompson RC, Moore CJ, vom Saal FS, Swan SH. 2009. Plastics, the environment and human  
473 health: current consensus and future trends. *Philos Trans R Soc B Biol Sci* 364:2153–2166.
- 474 5. Cozar A, Echevarria F, Gonzalez-Gordillo JI, Irigoien X, Ubeda B, Hernandez-Leon S, Palma AT,  
475 Navarro S, Garcia-de-Lomas J, Ruiz A, Fernandez-de-Puelles ML, Duarte CM. 2014. Plastic  
476 debris in the open ocean. *Proc Natl Acad Sci* 111:10239–10244.
- 477 6. Wenning RJ, Martello L. 2014. POPs in Marine and Freshwater Environments *Environmental*  
478 *Forensics for Persistent Organic Pollutants*. Elsevier B.V.
- 479 7. Opsahl S, Benner R. 1997. Distribution and cycling of terrigenous dissolved organic matter in  
480 the ocean. *Nature* 386:480–482.
- 481 8. Browne MA, Galloway TS, Thompson RC. 2010. Spatial patterns of plastic debris along  
482 estuarine shorelines. *Environ Sci Technol* 44:3404–3409.
- 483 9. Johnston EL, Mayer-pinto M, Crowe TP. 2015. Chemical contaminant effects on marine  
484 ecosystem functioning. *J Appl Ecol* 52:140–149.
- 485 10. Beier S, Bertilsson S. 2013. Bacterial chitin degradation-mechanisms and ecophysiological  
486 strategies. *Front Microbiol* 4:1–12.
- 487 11. Ruiz-Dueñas FJ, Martínez ÁT. 2009. Review Microbial degradation of lignin : how a bulky

- 488 recalcitrant polymer is efficiently recycled in nature and how we can take advantage of this.  
489 *Microb Biotechnol* 2:164–177.
- 490 12. Cavaliere M, Feng S, Soyer O, Jiminez J. 2017. Cooperation in microbial communities and their  
491 biotechnological applications. *Environ Microbiol* 19:2949–2963.
- 492 13. Zhang Z, Claessen D, Rozen DE. 2016. Understanding Microbial Divisions of Labor. *Front*  
493 *Microbiol* 7:1–8.
- 494 14. Ponomarova O, Patil KR. 2015. ScienceDirect Metabolic interactions in microbial  
495 communities : untangling the Gordian knot. *Curr Opin Microbiol* 27:37–44.
- 496 15. Delgado-Baquerizo M, Eldridge DJ, Ochoa V, Gozalo B, Singh BK, Maestre FT. 2017. Soil  
497 microbial communities drive the resistance of ecosystem multifunctionality to global change  
498 in drylands across the globe. *Ecol Lett* 20:1295–1305.
- 499 16. Hug LA, Co R. 2018. It Takes a Village: Microbial Communities Thrive through Interactions and  
500 Metabolic Handoffs. *mSystems* 3:e00152-17.
- 501 17. Yoshida S, Hiraga K, Takehana T, Taniguchi I, Yanaji H, Maeda Y, Toyohara K, Miyamoto K,  
502 Kimura Y, Oda K. 2016. A bacterium that degrades and assimilates  
503 poly(ethyleneterephthalate). *Science* (80- ) 351:1196–1199.
- 504 18. Austin HP, Allen MD, Donohoe BS, Rorrer NA, Kearns FL, Silveira RL, Pollard BC, Dominick G,  
505 Duman R, Omari K El, Mykhaylyk V, Wagner A, Michener WE, Amore A, Skaf MS, Crowley MF,  
506 Thorne AW, Johnson CW, Woodcock HL, McGeehan JE, Beckham GT. 2018. Characterization  
507 and engineering of a plastic-degrading aromatic polyesterase. *Proc Natl Acad Sci* 115:E4350–  
508 E4357.
- 509 19. Danso D, Schmeisser C, Chow J, Zimmermann W, Wei R, Leggewie C, Li X, Hazen T, Streit WR.  
510 2018. New insights into the function and global distribution of polyethylene terephthalate  
511 (PET) degrading bacteria and enzymes in marine and terrestrial metagenomes. *Appl Environ*

- 512 Microbiol 84:AEM.02773-17.
- 513 20. Wang W, Yang S, Hunsinger GB, Pienkos PT, Johnson DK, Avignone-rossa C. 2014. Connecting  
514 lignin-degradation pathway with pre-treatment inhibitor sensitivity of *Cupriavidus necator*.  
515 Front Microbiol 5:1–10.
- 516 21. Zhang Y-M, Sun Y, Wang Z-J, Zhang J. 2013. Degradation of terephthalic acid by a newly isolated  
517 strain of *Arthrobacter* sp . 0574. S Afr J Sci 109:1–4.
- 518 22. Fajardo C, Guyot P, Macarie H, Monroy O. 1997. Inhibition of anaerobic digestion by  
519 terephthalic acid and its aromatic by-products. Water Sci Technol 36:83–90.
- 520 23. Hesselsoe M, Boysen S, Iversen N, Jørgensen L, Murrell JC, McDonald I, Radajewski S, Thestrup  
521 H, Roslev P. 2005. Degradation of organic pollutants by methane grown microbial consortia.  
522 Biodegradation 16:435–448.
- 523 24. Abraham W-R, Nogales B, Golyshin P, Pieper D, Timmis K. 2002. Polychlorinated biphenyl-  
524 degrading microbial communities in soils and sediments. Curr Opin Microbiol 5:246–253.
- 525 25. Syranidou E, Karkanorachaki K, Amorotti F, Franchini M, Repouskou E, Kaliva M, Vamvakaki M,  
526 Kolvenbach B, Fava F, Corvini PFX, Kalogerakis N. 2017. Biodegradation of weathered  
527 polystyrene films in seawater microcosms. Sci Rep 7:1–12.
- 528 26. Syranidou E, Karkanorachaki K, Amorotti F, Repouskou E, Kroll K, Kolvenbach B, Corvini PF,  
529 Fava F, Kalogerakis N. 2017. Development of tailored indigenous marine consortia for the  
530 degradation of naturally weathered polyethylene films. PLoS One 1–21.
- 531 27. Duis K, Coors A. 2016. Microplastics in the aquatic and terrestrial environment : sources (with  
532 a specific focus on personal care products), fate and effects. Environ Sci Eur 28.
- 533 28. Swenson W, Wilson DS, Elias R. 2000. Artificial ecosystem selection. Proc Natl Acad Sci  
534 97:9110–9114.
- 535 29. Swenson W, Arendt J, Wilson DS. 2000. Artificial selection of microbial ecosystems for 3-

- 536 chloroaniline biodegradation. *Environ Microbiol* 2:564–571.
- 537 30. Williams HTP, Lenton TM. 2007. Artificial Ecosystem Selection for Evolutionary Optimisation,  
538 p. 93–102. *In* Almeida e Costa F., Rocha L.M., Costa E., Harvey I., CA (ed.), *Advances in Artificial*  
539 *Life. ECAL*.
- 540 31. Blouin M, Karimi B, Mathieu J, Lerch TZ. 2015. Levels and limits in artificial selection of  
541 communities. *Ecol Lett* 1040–1048.
- 542 32. Schloss PD, Westcott SL, Ryabin T, Hall JR, Hartmann M, Hollister EB, Lesniewski RA, Oakley  
543 BB, Parks DH, Robinson CJ, Sahl JW, Stres B, Thallinger GG, Van Horn DJ, Weber CF. 2009.  
544 Introducing mothur: Open-source, platform-independent, community-supported software for  
545 describing and comparing microbial communities. *Appl Environ Microbiol* 75:7537–7541.
- 546 33. Callahan BJ, Sankaran K, Fukuyama JA, McMurdie PJ, Holmes SP. 2016. Bioconductor Workflow  
547 for Microbiome Data Analysis: from raw reads to community analyses. *F1000Research* 5:1492.
- 548 34. Callahan BJ, McMurdie PJ, Rosen MJ, Han AW, Johnson AJA, Holmes SP. 2016. DADA2: High-  
549 resolution sample inference from Illumina amplicon data. *Nat Methods* 13:581–583.
- 550 35. Hugerth LW, Andersson AF. 2017. Analysing microbial community composition through  
551 amplicon sequencing: From sampling to hypothesis testing. *Front Microbiol* 8:1–22.
- 552 36. Langille MGI, Zaneveld J, Caporaso JG, McDonald D, Knights D, Reyes JA, Clemente JC,  
553 Burkepille DF, Vega Thurber RL, Knight R, Beiko RG, Huttenhower C. 2013. Predictive functional  
554 profiling of microbial communities using 16S rRNA marker gene sequences. *Nat Biotechnol*  
555 31:1814–821.
- 556 37. Kanehisa M, Goto S. 2000. KEGG; Kyoto Encyclopedia of Genes and Genomes. *Nucleic Acids*  
557 *Res* 28:27–30.
- 558 38. Kanehisa M, Furumichi M, Tanabe M, Sato Y, Morishima K. 2017. KEGG: New perspectives on  
559 genomes, pathways, diseases and drugs. *Nucleic Acids Res* 45:D353–D361.

- 560 39. Kanehisa M, Sato Y, Kawashima M, Furumichi M, Tanabe M. 2016. KEGG as a reference  
561 resource for gene and protein annotation. *Nucleic Acids Res* 44:D457–D462.
- 562 40. Penn A, Harvey I. 2004. The role of non-genetic change in the heritability, variation, and  
563 response to selection of artificially selected ecosystems. *Artif Life IX* 352–357.
- 564 41. Datta MS, Sliwerska E, Gore J, Polz M, Cordero OX. 2016. Microbial interactions lead to rapid  
565 micro-scale successions on model marine particles. *Nat Commun* 7:1–7.
- 566 42. Datta MS, Sliwerska E, Gore J, Polz MF, Cordero OX. 2016. Microbial interactions lead to rapid  
567 micro-scale successions on model marine particles. *Nat Commun* 7:11965.
- 568 43. Beier S, Bertilsson S. 2011. Uncoupling of chitinase activity and uptake of hydrolysis products  
569 in freshwater bacterioplankton. *Limnol Ocean* 56:1179–1188.
- 570 44. Keyhani NO, Roseman S. 1999. Physiological aspects of chitin catabolism in marine bacteria.  
571 *Biochim Biophys Acta* 1473 1473:108–122.
- 572 45. Patterson D, Steinberg G, Nygaard K, Steinberg G. 1993. Heterotrophic flagellates and other  
573 protists associated with oceanic detritus throughout the water column in the mid north  
574 atlantic. *J Mar Biol Assoc United Kingdom* 73:67–95.
- 575 46. Volterra V. 1926. Fluctuations in the Abundance of a Species considered Mathematically.  
576 *Nature* 118:558–560.
- 577 47. Lotka AJ. 1926. Elements of Physical Biology. *Sci Prog Twent Century* 21:341–343.
- 578 48. Das SN, Sarma PVS RN, Neeraja C, Malati N, Podile AR. 2010. Members of  
579 Gammaproteobacteria and Bacilli represent the culturable diversity of chitinolytic bacteria in  
580 chitin-enriched soils. *World J Microbiol Biotechnol* 26:1875–1881.
- 581 49. Lecleir GR, Buchan A, Maurer J, Moran MA, Hollibaugh JT. 2007. Comparison of chitinolytic  
582 enzymes from an alkaline, hypersaline lake and an estuary. *Environ Microbiol* 9:197–205.
- 583 50. Kielak AM, Cretoiu MS, Semenov A V., Sørensen SJ, Van Elsas JD. 2013. Bacterial chitinolytic

- 584 communities respond to chitin and pH alteration in soil. *Appl Environ Microbiol* 79:263–272.
- 585 51. Fontanez KM, Eppley JM, Samo TJ, Karl DM, DeLong EF. 2015. Microbial community structure  
586 and function on sinking particles in the North Pacific Subtropical Gyre. *Front Microbiol* 6:1–14.
- 587 52. Aunkham A, Zahn M, Kesireddy A, Pothula KR, Schulte A, Baslé A, Kleinekathöfer U, Suginta W,  
588 Van Den Berg B. 2018. Structural basis for chitin acquisition by marine *Vibrio* species. *Nat*  
589 *Commun* 9:1–13.
- 590 53. Giubergia S, Phippen C, Nielsen KF, Gram L. 2017. Growth on Chitin Impacts the Transcriptome  
591 and Metabolite Profiles of Antibiotic-Producing *Vibrio coralliilyticus* S2052 and  
592 *Photobacterium galathea* S2753. *mSystems* 2:1–12.
- 593 54. Morris RM, Rappé MS, Connon SA, Vergin KL, Siebold WA, Carlson CA, Giovannoni SJ. 2002.  
594 SAR11 clade dominates ocean surface bacterioplankton communities. *Nature* 420:806–810.
- 595 55. Billerbeck S, Wemheuer B, Voget S, Poehlein A, Giebel HA, Brinkhoff T, Gram L, Jeffrey WH,  
596 Daniel R, Simon M. 2016. Biogeography and environmental genomics of the Roseobacter-  
597 affiliated pelagic CHAB-I-5 lineage. *Nat Microbiol* 1:1–8.
- 598 56. Beygmoradi A, Homaei A. 2018. Marine chitinolytic enzymes, a biotechnological treasure  
599 hidden in the ocean? *Appl Microbiol Biotechnol* 1–12.
- 600 57. Patil RS, Ghormade V, Deshpande M V. 2000. Chitinolytic enzymes: An exploration. *Enzyme*  
601 *Microb Technol* 26:473–483.
- 602 58. Cottrell MT, Moore JA, David L, Kirchman DL. 1999. Chitinases from Uncultured Marine  
603 Microorganisms Chitinases from Uncultured Marine Microorganisms. *Appl Environ Microbiol*  
604 65:2553–2557.
- 605 59. Eckert EM, Baumgartner M, Huber IM, Pernthaler J. 2013. Grazing resistant freshwater  
606 bacteria profit from chitin and cell-wall-derived organic carbon. *Environ Microbiol* 15:2019–  
607 2030.

- 608 60. Nedoma J, Vrba J, Hejzlar J, Šimek K, Straškrabová V. 1994. N-acetylglucosamine dynamics in  
609 freshwater environments: Concentration of amino sugars, extracellular enzyme activities, and  
610 microbial uptake. *Limnol Oceanogr* 39:1088–1100.
- 611 61. Riemann L, Azam F. 2002. Widespread N -Acetyl-d-Glucosamine Uptake among Pelagic Marine  
612 Bacteria and Its Ecological Implications. *Appl Environ Microbiol* 68:5554–5562.
- 613 62. Hood MA. 1991. Comparison of four methods for measuring chitinase activity and the  
614 application of the 4-MUF assay in aquatic environments. *J Microbiol Methods* 13:151–160.
- 615 63. Köllner KE, Carstens D, Keller E, Vazquez F, Schubert CJ, Zeyer J, Bürgmann H. 2012. Bacterial  
616 chitin hydrolysis in two lakes with contrasting trophic statuses. *Appl Environ Microbiol* 78:695–  
617 704.
- 618 64. Guillard RRL, Ryther JH. 1962. Studies of Marine Planktonic Diatoms: I. *cyclotella*, *Nana*  
619 *hustedt*, and *Detonula confervacea* (cleve) gran. *Can J Microbiol* 8:229–239.
- 620 65. Day MD, Beck D, Foster JA. 2011. Microbial Communities as Experimental Units. *Bioscience*  
621 61:398–406.
- 622 66. Bryant JA, Clemente TM, Viviani DA, Fong AA, Thomas KA, Kemp P, Karl DM, White AE, DeLong  
623 EF. 2016. Diversity and activity of communities inhabiting plastic debris in the North Pacific  
624 Gyre. *mSystems* 1:e00024-16.
- 625 67. Parada AE, Needham DM, Fuhrman JA. 2016. Every base matters : assessing small subunit  
626 rRNA primers for marine microbiomes with mock communities , time series and global field  
627 samples. *Environ Microbiol* 18:1403–1414.
- 628 68. Bradley IM, Pinto AJ, Guest JS. 2016. Design and evaluation of illumina MiSeq-compatible, 18S  
629 rRNA gene-specific primers for improved characterization of mixed phototrophic  
630 communities. *Appl Environ Microbiol* 82:5878–5891.
- 631 69. Quast C, Pruesse E, Yilmaz P, Gerken J, Schweer T, Glo FO, Yarza P. 2013. The SILVA ribosomal

- 632 RNA gene database project : improved data processing and web-based tools. *Nucleic Acids Res*  
633 41:590–596.
- 634 70. Lane DJ. 1991. 16S/23S rRNA Sequencing, p. 115–175. *In* Stackebrandt, E. and Goodfellow, M  
635 (ed.), *Nucleic Acid Techniques in Bacterial Systematic*.
- 636 71. Pedregosa F, Weiss R, Brucher M. 2011. Scikit-learn : Machine Learning in Python. *J Mach Learn*  
637 *Res* 12:2825–2830.
- 638 72. Team RC. 2017. R: A language and environment for statistical computing. *R Found Stat*  
639 *Comput*.
- 640 73. Paradis E, Claude J, Strimmer K. 2004. APE: Analyses of Phylogenetics and Evolution in R  
641 language. *Bioinformatics* 20:289–290.
- 642 74. Yu G, Smith DK, Zhu H, Guan Y, Lam TT. 2017. GGTREE: an R package for visualization and  
643 annotation of phylogenetic trees with their covariates and other associated data. *Methods*  
644 *Ecol Evol* 8:28–36.
- 645 75. Schliep KP. 2011. phangorn: phylogenetic analysis in R. *Bioinformatics* 27:592–593.
- 646 76. Dixon P. 2003. VEGAN, a package of R functions for community ecology. *J Veg Sci* 14:927–930.
- 647 77. Mccurdie PJ, Holmes S. 2013. phyloseq : An R Package for Reproducible Interactive Analysis  
648 and Graphics of Microbiome Census Data 8.
- 649 78. Caporaso JG, Kuczynski J, Stombaugh J, Bittinger K, Bushman FD, Costello EK, Fierer N, Peña  
650 AG, Goodrich JK, Gordon JI, Huttley G a, Kelley ST, Knights D, Koenig JE, Ley RE, Lozupone C a,  
651 Mcdonald D, Muegge BD, Pirrung M, Reeder J, Sevinsky JR, Turnbaugh PJ, Walters W a,  
652 Widmann J, Yatsunencko T, Zaneveld J, Knight R. 2010. QIIME allows analysis of high-  
653 throughput community sequencing data. *Nat Methods* 7:335–336.
- 654 79. Pruesse E, Peplies J, Glöckner FO. 2012. SINA: Accurate high-throughput multiple sequence  
655 alignment of ribosomal RNA genes. *Bioinformatics* 28:1823–1829.





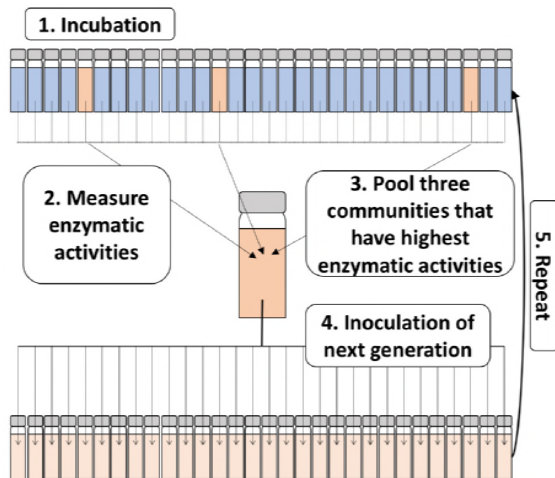

**Figure 1.** Method used for artificial selection of microbial communities. Briefly, 30 microcosms are inoculated with a natural community found in seawater (1). At the end of the incubation period, the enzymatic activity for a desired trait (*e.g.* chitinase activity) is measured for each microcosm (2). The three microcosms with the highest enzymatic activities are selected and pooled (3), and used to inoculate the next generation (4). This process is repeated over  $n$  generations (5).

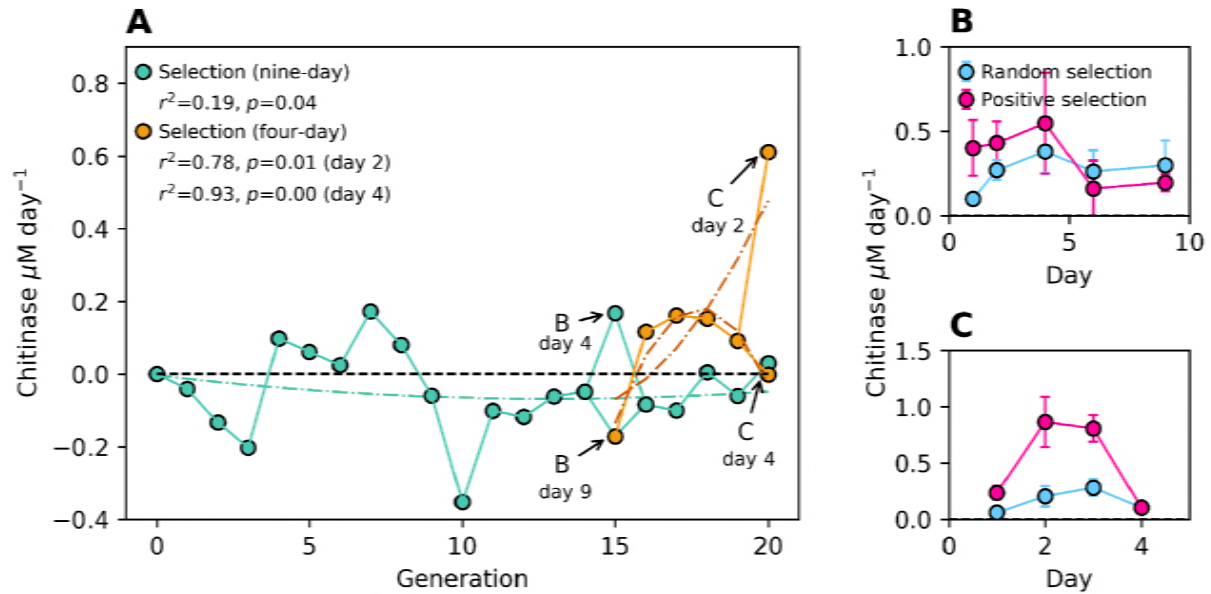

**Figure 2.** Chitinase activity in artificial selection experiment 1. **(A)** Enzymatic activity measured over 20 generations. Each point represents the mean of the positive selection communities ( $n=30$ ) to which the mean of the randomly selected controls ( $n=30$ ) was subtracted. The black dotted line (zero) represents where chitinase activity of the positive selection is equal to that of the random selection. Coloured dotted lines show the general trend for the respective incubation times generated by a linear regression model within Python's statsmodels package (green and orange for nine- and four-day incubations, respectively). The  $r^2$  and  $p$ -values for Pearson's correlation coefficients between generation number and normalised chitinase activity are shown. **(B)** Chitinase activity measured within generation 15 of the 9-day incubation. **(C)** Chitinase activity measured within generation 20 of the 4-day incubation. In panels B and C, each point represents absolute chitinase activity measured in the positive (red) and random selection (blue).

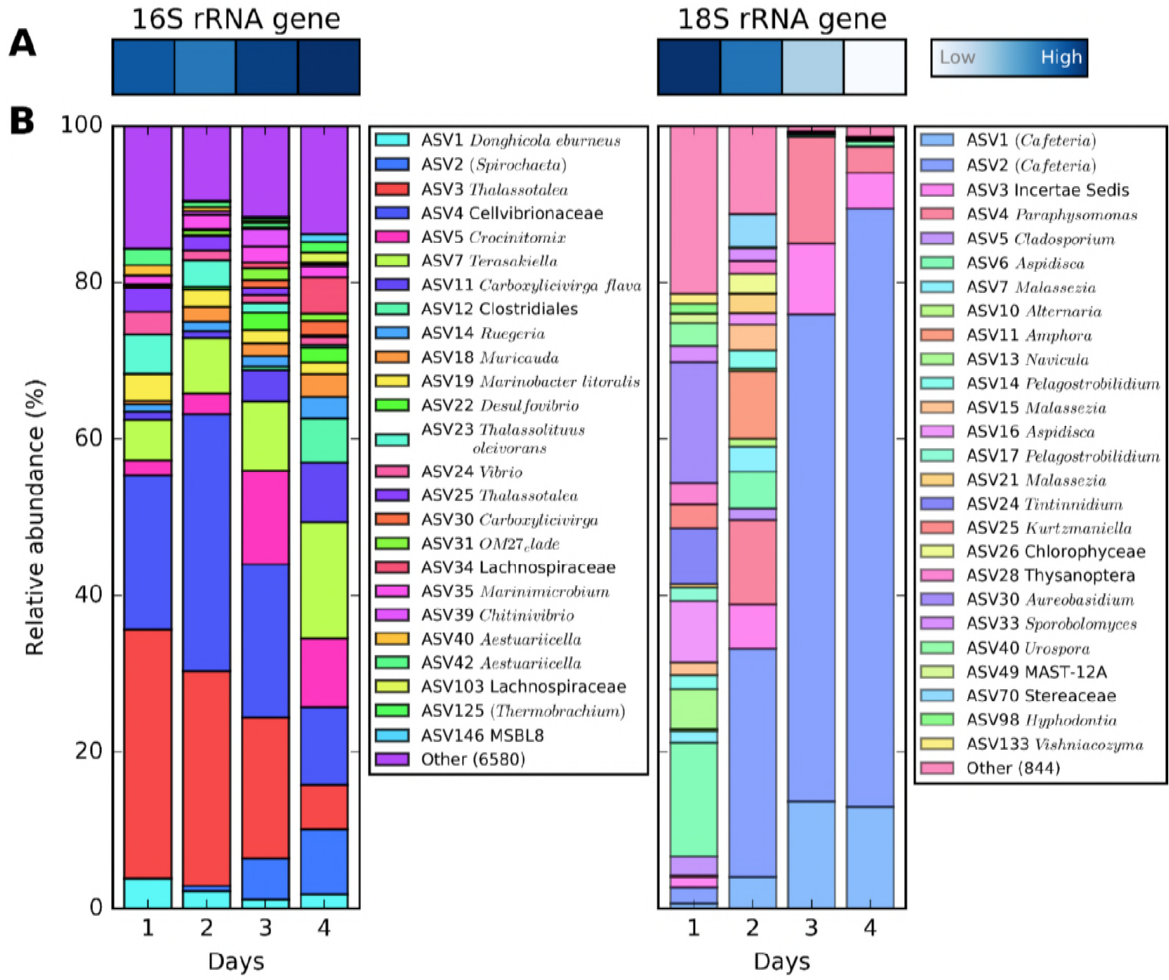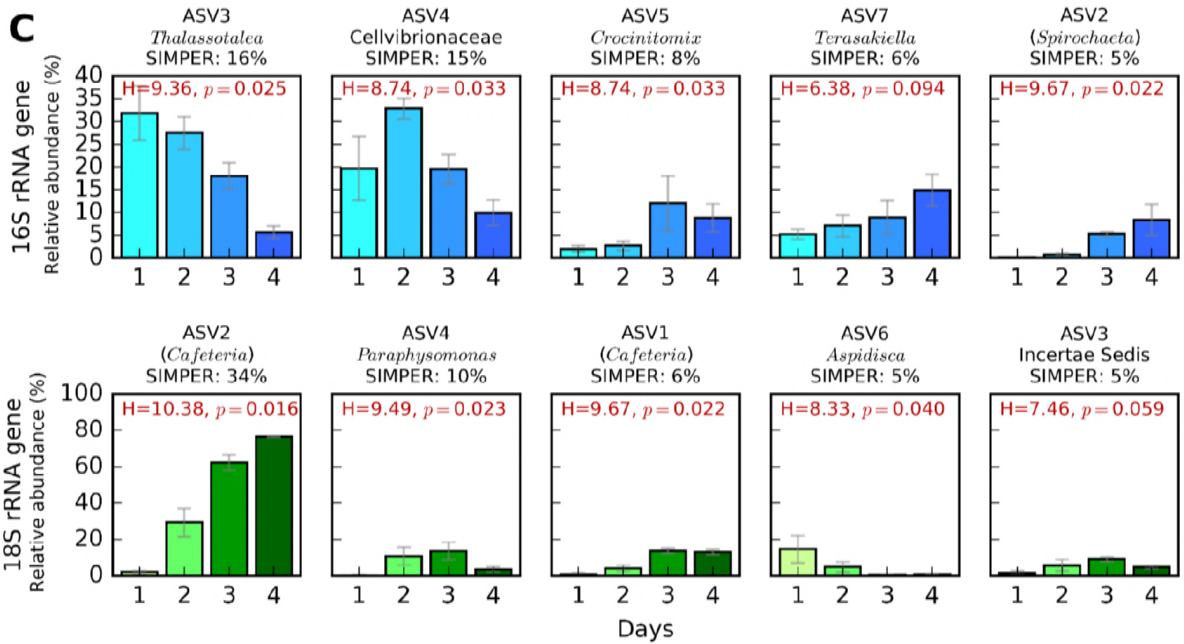

**Figure 3.** Daily microbial community analysis over the four day incubation period within generation 20. The analysis was performed on the three communities that showed highest chitinase activity by the end of the four days and which would have been used to inoculate the next generation. **(A)** Simpsons index of diversity of the 16S (left) and 18S rRNA gene (right) amplicon analysis. Scale ranges between 0.38 (low) and 0.93 (high). **(B)** Community relative abundance over the 4 day incubation period. Only ASVs with abundance above 1% in at least one time point are shown. The abundance for each ASV is a mean value from the three communities. ASVs were classified to genus level by SILVA. Names in brackets were not identifiable with the standard analysis pipeline and were identified through a BLAST search of the NCBI database. **(C)** Five 16S and 18S rRNA gene ASVs that contributed the most to the community variations over time according to a SIMPER analysis. The percentage of variation to which each ASV contributes is indicated. Error bars represent the standard deviations of three communities used to inoculate the next generation.

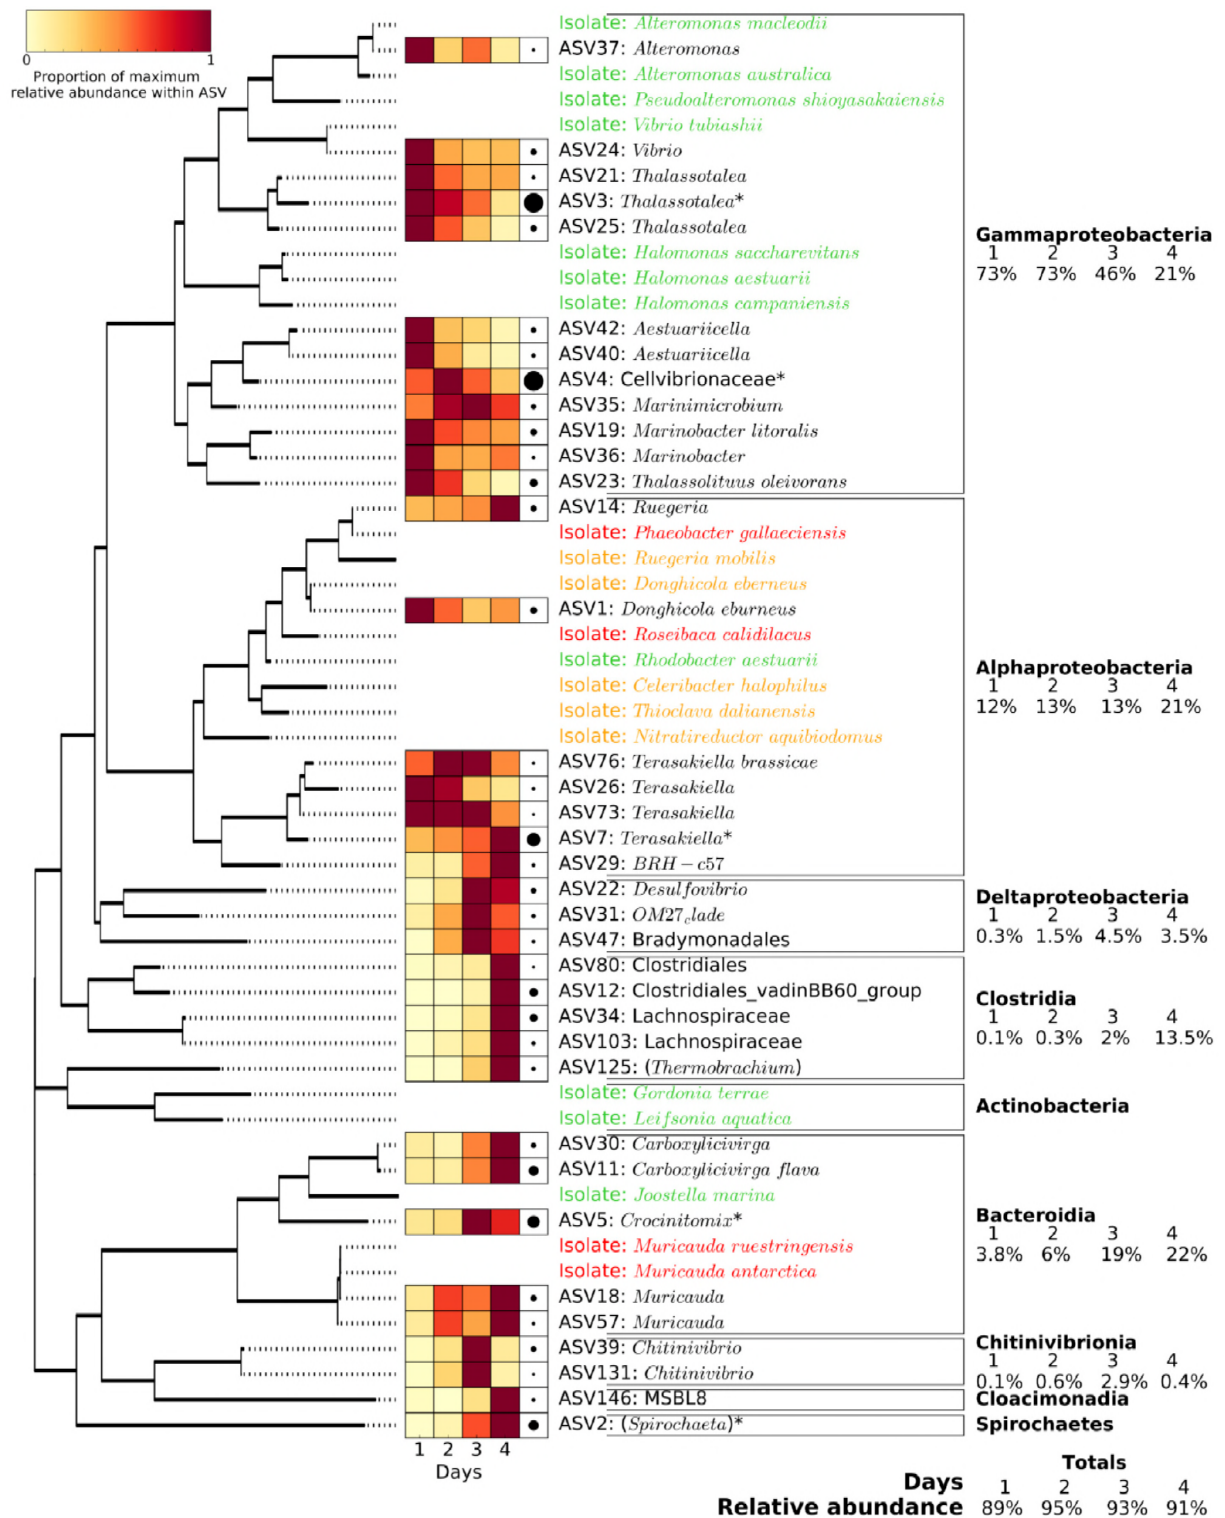

**Figure 4.** Phylogenetic analysis and relative abundance of the major 16S rRNA gene ASVs (*i.e.* with relative abundance above 0.5% in at least one of the four days) and bacterial isolates obtained at the end of the artificial selection experiment. Phylogenetic grouping is represented by a mid-point

rooted maximum likelihood phylogenetic tree. The 36 ASVs represented in the figure (out of the 6605 total ASVs detected) accounted for 92% of all 16S rRNA gene relative abundance. The heatmap represents the relative abundance of each ASV over the four days, with darker red showing the day at which the ASV showed maximum abundance. Black circles on the right of the heatmap represent the maximum relative abundance for that ASV amongst the entire community. The 20 isolates are coloured depending on their ability to grow on chitin and the monomer, GlcNAc (green), the GlcNAc only (orange), or neither (red).

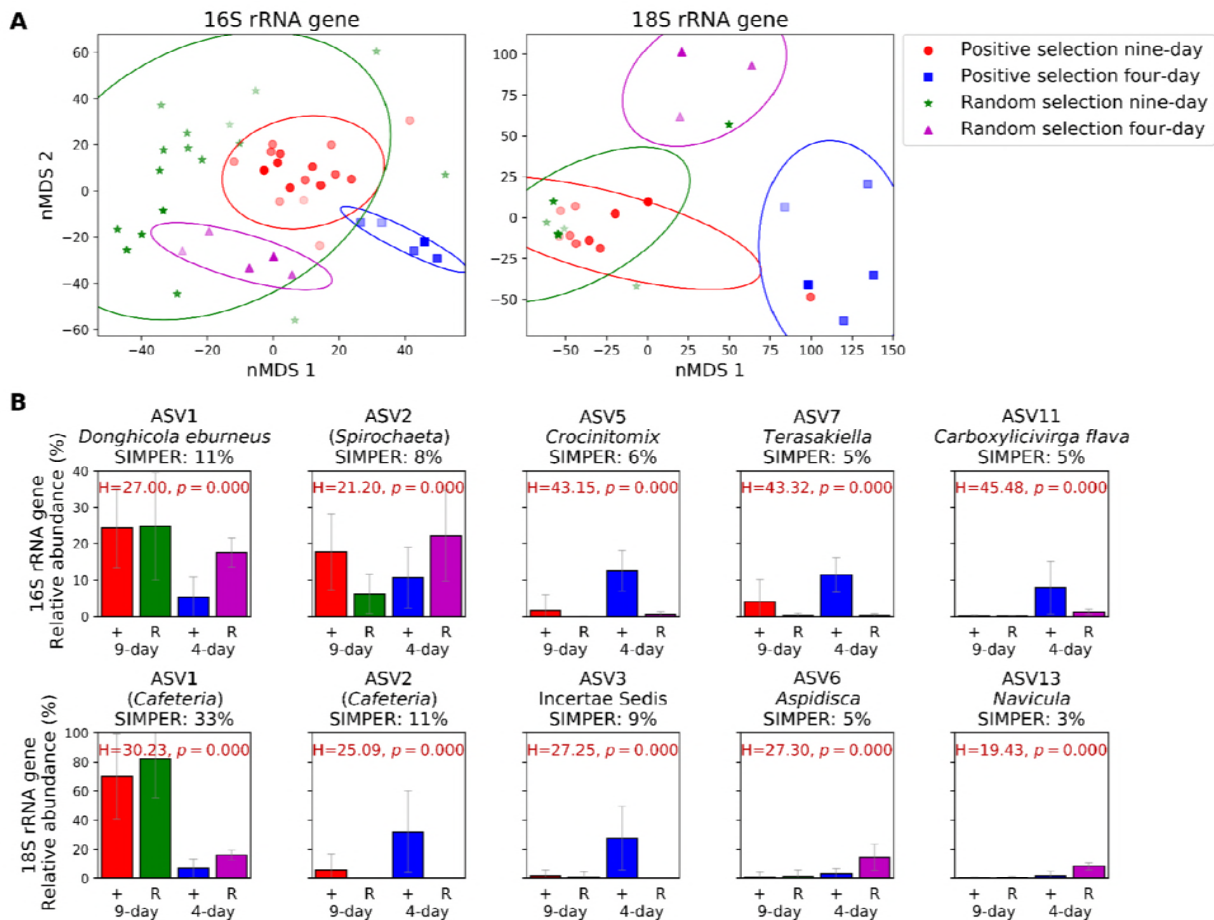

**Figure 5.** Microbial community variation over the entire artificial selection experiment. **(A)** nMDS plot showing Bray-Curtis distance of 16S (left) and 18S communities (right). Distance between the community composition obtained from nine-day (red circles) and four-day incubations (blue squares) of the positive selection, and nine-day (green stars) and four-day incubations (purple triangles) of the random controls are shown. Marker colour intensity correlates to generation number, where progressive darker colours represent later generations. Each point represents the mean of the three communities selected from one generation used to inoculate the following one. Ellipses show the mean plus the standard deviation of each group of samples. Stress values are 0.175 for the 16S rRNA gene and 0.063 for the 18S rRNA gene. **(B)** Five 16S (top panel) and 18S rRNA gene ASVs (bottom panel) that contributed the most towards community variations between the nine-day (generations 0-20) and four-day (generations 16-20) positive (+) and random (R)



selections according to SIMPER analyses. The percentage of variation to which each ASV contributes is indicated. ASVs were classified to the species level with the standard analysis pipeline using the SILVA database where possible. Names in brackets were not identifiable and were identified through a BLAST search of the NCBI database. Relative abundances and error bars shown are the mean and standard deviations of all generations within that treatment.

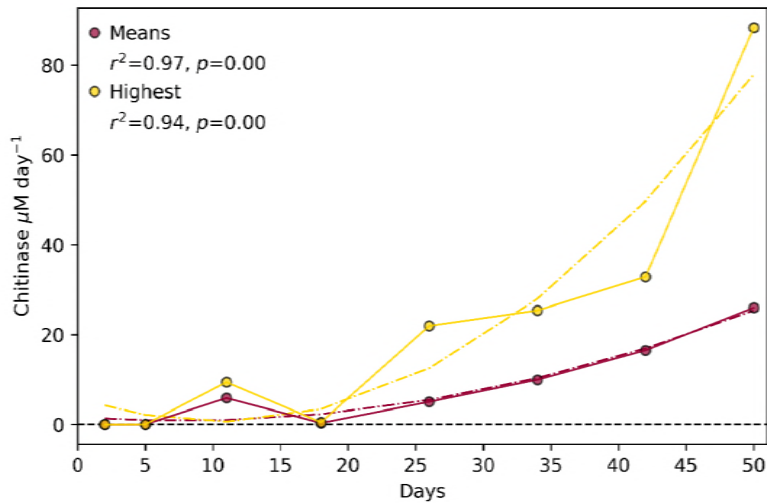

**Figure 6.** Chitinase activity of artificial selection experiment 2. Graph show the mean chitinase activity of the positive selection, from which the mean random selection was subtracted. The means of all communities within the generation ( $n=30$ ; red) and those of only the three communities that were pooled for the inoculum of the next generation (yellow) are shown. The  $r^2$  and  $p$ -values are for Pearson's correlation coefficients and lines of best fit (dotted lines) were determined using linear regression models within Python's statsmodels package.
